# Supplementary material for: Regulation of endoplasmic reticulum stress on autophagy and apoptosis of nucleus pulposus cells in intervertebral disc degeneration and its related mechanisms
Source: PeerJ. 2024 Apr 22;12:e17212. doi: 10.7717/peerj.17212 (PMC11044878; doi:10.7717/peerj.17212)
Supplement: Supplemental Information 1 [file peerj-12-17212-s001.xlsx]

## Sheet: CCK 8
CCK8 1
Normal	Hypo	SD	Hypo+SD
92.3	98.1	70.3	81.3
100.5	104.6	75.6	90.7
107.2	94.3	62.3	85.2
CCK8 2
Control	LPS	LPS+4-PBA	LPS+TP
99.7	76.2	88.9	50.1
106.2	63.7	84.6	43.9
94.1	70.1	82.1	56.7
CCK8 3
Control	LPS	LPS+z-VAD-FMK	LPS+3-MA
106.1	69.8	55.7	72.2
92.6	76.2	48.3	64.7
101.3	64.5	56.9	60.1

## Sheet: apoptosis
Apoptosis 1
Normal	Hypo	SD	Hypo+SD
1.55	1.09	12.89	7.2
1.75	1.05	10.64	7.05
1.46	1.22	12.81	6.73
Apoptosis 2
Control	LPS	LPS+4-PBA	LPS+TP
6.87	16.85	16.32	21.39
6.82	18.36	14.67	23.08
6.88	16.21	15.06	20.55
Apoptosis 3
Control	LPS	LPS+z-VAD-FMK	LPS+3-MA
6.31	17.06	6.47	20.54
6.86	16.87	7.79	19.48
6.97	15.15	7.96	22.01

## Sheet: WB
1	LC3II/I
	Normal	Hypo	SD	Hypo+SD
	1.00375	0.567849	3.83514	2.8877
	0.92807	0.489765	4.73186	3.39703
	1.06818	0.389167	3.70272	2.67903
2	GRP78					CHOP					XBP-1s
	Control	LPS	LPS+4-PBA	LPS+TP		Control	LPS	LPS+4-PBA	LPS+TP		Control	LPS	LPS+4-PBA	LPS+TP
	1.51551	4.26457	2.92391	4.74874		0.87824	5.01876	3.15688	5.38717		1.26124	2.06712	1.69242	2.48931
	0.875792	3.86104	2.6226	4.72788		0.998447	4.99672	3.49583	5.90544		0.835209	1.97913	1.61351	2.36255
	0.608693	4.25816	2.04468	4.86402		1.12331	4.8124	2.68969	5.67374		0.903555	1.89592	1.28736	2.27958
3	Bax					Bcl-2					Cleaved-caspase3/caspase3					Caspase12
	Control	LPS	LPS+4-PBA	LPS+TP		Control	LPS	LPS+4-PBA	LPS+TP		Control	LPS	LPS+4-PBA	LPS+TP		Control	LPS	LPS+4-PBA	LPS+TP
	0.777757	1.93321	1.38289	2.15517		1.06582	0.566906	0.887093	0.382203		1.21479	1.66071	1.32076	1.89194		1.31633	2.50398	1.85848	3.31105
	1.18073	1.88974	1.50877	2.35234		0.88203	0.550234	0.748976	0.248501		0.867273	1.47809	1.12393	1.77556		0.824368	2.73778	2.22049	3.06413
	1.04152	1.7379	1.17427	2.0969		1.05215	0.617094	0.794278	0.304646		0.917937	1.54776	1.10367	1.99476		0.859306	2.42943	1.38775	3.42788
4	Beclin-1					LC3II/I
	Control	LPS	LPS+4-PBA	LPS+TP		Control	LPS	LPS+4-PBA	LPS+TP
	1.35691	2.78239	1.97183	3.4164		1.29803	2.48872	1.80558	3.25618
	1.01974	2.93884	2.4414	3.45563		0.96388	2.15318	1.48253	2.71846
	0.623352	2.76262	1.58532	3.23832		0.738095	2.40526	1.15517	3.02157
5	GRP78					CHOP					XBP-1s
	Control	LPS	LPS+z-VAD-FMK	LPS+3-MA		Control	LPS	LPS+z-VAD-FMK	LPS+3-MA		Control	LPS	LPS+z-VAD-FMK	LPS+3-MA
	1.54861	2.87153	5.36768	3.76331		0.609281	6.19837	8.53757	7.46342		1.13643	1.97839	3.08269	2.35972
	1.12931	3.41307	6.52966	4.30368		0.790176	6.2454	9.23745	8.13179		0.835957	2.1971	3.08356	2.44689
	0.322073	3.46131	6.53911	4.52649		1.60054	5.63388	8.33199	7.39507		1.02762	2.17184	3.23602	2.5496
6	Bax					Bcl-2					Cleaved-caspase3/caspase3					Caspase12
	Control	LPS	LPS+z-VAD-FMK	LPS+3-MA		Control	LPS	LPS+z-VAD-FMK	LPS+3-MA		Control	LPS	LPS+z-VAD-FMK	LPS+3-MA		Control	LPS	LPS+z-VAD-FMK	LPS+3-MA
	0.852254	1.84621	1.33699	2.51115		0.910886	0.555995	0.799396	0.129015		1.23211	1.50577	1.01593	1.89015		1.30371	1.76129	0.736954	2.43927
	1.06095	1.99026	1.57557	2.40892		1.01114	0.640836	0.795569	0.175561		1.01291	1.63006	0.925649	2.07646		0.701506	2.17058	0.370126	2.92054
	1.08679	2.2584	1.60055	2.69182		1.07798	0.718169	0.935601	0.121898		0.787074	1.14213	0.503206	1.79552		0.994787	2.00577	0.564	2.53261
7	Beclin-1					LC3II/I
	Control	LPS	LPS+z-VAD-FMK	LPS+3-MA		Control	LPS	LPS+z-VAD-FMK	LPS+3-MA
	1.14136	1.93503	2.35144	0.311375		1.12456	1.88324	2.01906	0.246637
	0.960981	1.75461	2.02605	0.31462		1.0775	1.78482	2.20075	0.185908
	0.897655	1.77142	2.13541	0.485983		0.797938	1.6241	1.9765	0.242627
8	RIP1					RIP3
	Control	LPS	LPS+z-VAD-FMK	LPS+3-MA		Control	LPS	LPS+z-VAD-FMK	LPS+3-MA
	1.79659	4.84778	7.83656	6.47316		1.1871	1.80984	2.54173	2.15485
	0.752267	5.08348	6.83698	6.04341		0.875221	1.89835	2.6607	2.32839
	0.451145	5.32039	7.71483	6.34079		0.937676	1.64019	2.44815	2.01167

## Sheet: ELISA
IL-1β
Control	LPS	LPS+z-VAD-FMK	LPS+3-MA
12.1	39.8	58.9	45.4
10.8	36.2	63.7	43.2
13.6	32.1	55.3	47.9
TNF-α
Control	LPS	LPS+z-VAD-FMK	LPS+3-MA
37.4	134.7	228.6	184.3
42.6	110.8	211.5	195.1
25.1	95.2	239.7	169.4
iNOS
Control	LPS	LPS+z-VAD-FMK	LPS+3-MA
63.8	100.8	216.4	159.8
51.2	92.4	241.4	142.4
38.6	110.4	195.8	165.2
IL-6
Control	LPS	LPS+z-VAD-FMK	LPS+3-MA
19.6	75.2	123.6	113.6
15.2	85	127.2	105.2
24.8	63.2	136.8	100.2
